# Supplementary material for: Omega-3 Polyunsaturated Fatty Acids, Gut Microbiota, Microbial Metabolites, and Risk of Colorectal Adenomas
Source: Cancers (Basel). 2022 Sep 13;14(18):4443. doi: 10.3390/cancers14184443 (PMC9496906; doi:10.3390/cancers14184443)
Supplement: Supplementary file 1 [file cancers-14-04443-s001.zip › cancers-1891194-supplementary.pdf]

**Supplemental Table S1. Differential Microbial Metabolites (Bile Acids) by Gut Microbiota and Short-Chain  $\omega$ -3 PUFA Levels Among Controls**

| Level                                   | Differential Metabolites              | Fold Change |
|-----------------------------------------|---------------------------------------|-------------|
| Richness (low vs. high)                 | Glycocholate                          | 2.0621      |
|                                         | 7-ketodeoxycholate; 12-dehydrocholate | 0.4238      |
| Evenness (low vs. high)                 | Glycocholate                          | 2.2711      |
| Diversity (low vs. high)                | 7-ketodeoxycholate; 12-dehydrocholate | 0.4867      |
| Sphingomonas (low vs. high)             | Chenodeoxycholate                     | 2.2989      |
| Marinomonas (low vs. high)              | 7-ketodeoxycholate; 12-dehydrocholate | 0.4612      |
|                                         | Taurodeoxycholate                     | 0.4652      |
| Sutterella (low vs. high)               | Cholate                               | 2.3529      |
| Parabacteroides (low vs. high)          | 7-ketodeoxycholate; 12-dehydrocholate | 0.4081      |
| Pseudoalteromonas (low vs. high)        | None                                  | N.A.        |
| Ralstonia (low vs. high)                | Chenodeoxycholate                     | 2.0402      |
| Short-chain omega-3 PUFA (low vs. high) | 7-ketodeoxycholate; 12-dehydrocholate | 2.1823      |

**Supplemental Table S2. Descriptive Characteristics of Study Participants with Microbial Metabolites (Bile Acids) Measurements, Diet and Health Study V, 2008-2010 (N=50)**

| <b>Selected Characteristics</b>                                 | <b>Cases</b>    | <b>Controls</b> |
|-----------------------------------------------------------------|-----------------|-----------------|
| Age (years), mean (SE)                                          | 54.4 (4.2)      | 57 (8.7)        |
| Male (%)                                                        | 40.9            | 64.0            |
| White (%)                                                       | 81.8            | 96.0            |
| Family history of colorectal cancer in 1st degree relative (%)  | 3.4             | 4.6             |
| Regular ( $\geq$ once/week) NSAID use (%)                       | 65.0            | 57.1            |
| Total energy intake (kcal/day), mean (SE)                       | 1,771.5 (675.1) | 1,815.9 (716.3) |
| Total $\omega$ -3 polyunsaturated fat intake (g/day), mean (SE) | 1.7 (0.7)       | 1.6 (0.7)       |
| Total $\omega$ -6 polyunsaturated fat intake (g/day), mean (SE) | 15.2 (6.8)      | 13.8 (6.5)      |
| Total saturated fat intake (g/day), mean (SE)                   | 24.3 (11.5)     | 20.7 (8.9)      |
| Total vegetables intake (servings/day), mean (SE)               | 3.9 (2.2)       | 4.5 (2.9)       |
| Total fruit intake (servings/day), mean (SE)                    | 2.2 (1.7)       | 3.0 (2.3)       |
| Red meat (oz/day), mean (SE)                                    | 1.4 (0.8)       | 1.4 (1.5)       |
| Dietary fiber intake (g/day), mean (SE)                         | 18.2 (7.6)      | 20.6 (10.5)     |
| Total calcium intake (mg/day), mean (SE)                        | 852.6 (549.3)   | 753.6 (301.3)   |
| Total folate intake (mcg/day), mean (SE)                        | 367.2 (133.9)   | 412.8 (193.1)   |
| Total vitamin E intake (mg/day), mean (SE)                      | 10.0 (4.4)      | 10.1 (4.5)      |
| Ever Smoked (%)                                                 | 45.0            | 52.4            |
| Alcohol intake, mean (SE)                                       | 10.8 (25.7)     | 9.7 (9.1)       |
| Body mass index (kg/m <sup>2</sup> ), mean (SE)                 | 30.0 (8.7)      | 26.8 (4.3)      |
| Waist-to-hip ratio, mean (SE)                                   | 0.93 (0.1)      | 0.94 (0.1)      |
| Distal adenoma (%), mean (SE)                                   | N.A.            | N.A.            |
| Adenoma size (cm), mean (SE)                                    | 6.8 (3.9)       | N.A.            |
| Bacteria diversity, mean (SE)                                   | 6.9 (3.2)       | 6.6 (3.1)       |
| Bacteria evenness, mean (SE)                                    | 0.7 (0.3)       | 0.7 (0.3)       |
| Bacteria richness, mean (SE)                                    | 9.0 (7.0)       | 8.5 (6.8)       |

Abbreviations: SE, standard error; NSAID, nonsteroidal anti-inflammatory drug; N.A. not applicable.
